# Supplementary material for: Plasma-enhanced atomic layer deposition of AlPO 4 /AlP x O y : comparing dual source and supercycle approaches for composition control
Source: Royal Society of Chemistry journal article supplement (doi:10.1039/d5dt02282g), 2025-01-01
Supplement: d5dt02282g1.pdf [file d5dt02282g1.pdf]

## Supporting Information

for

### Plasma-Enhanced Atomic Layer Deposition of $\text{AlPO}_4/\text{AlP}_x\text{O}_y$ : Comparing Dual Source and Supercycle Approaches for Composition Control

Florian Preischel<sup>a,b</sup>, David Zanders<sup>a</sup>, Jean-Pierre Glauber<sup>a,b</sup>, Karl Rönnyby<sup>c</sup>, Detlef Rogalla<sup>d</sup>, Thomas Gemming<sup>b</sup>, Peter Dement,<sup>b</sup> Michal Nolan,<sup>c</sup> Anjana Devi<sup>a,b,e,f\*</sup>

<sup>a</sup> Inorganic Materials Chemistry, Ruhr University Bochum, Universitätsstr. 150, 44801 Bochum, Germany

<sup>b</sup> Leibniz Institute for Solid State and Materials Research, Helmholtzstr. 20, 01069 Dresden, Germany

<sup>c</sup> Tyndall National Institute, Lee Maltings, University College Cork, Cork T12 R5CP, Ireland

<sup>d</sup> RUBION, Ruhr University Bochum, Universitätsstr. 150, 44801 Bochum, Germany

<sup>e</sup> Fraunhofer Institute for Microelectronic Circuits and Systems (IMS), Finkenstr. 61, Duisburg, Germany

<sup>f</sup> Chair of Materials Chemistry, TU Dresden, Bergstr. 66, 01069 Dresden, Germany

## Contents

|                                                                                                                                                                                                                                                    |          |
|----------------------------------------------------------------------------------------------------------------------------------------------------------------------------------------------------------------------------------------------------|----------|
| <b>Synthesis and characterization of TMA phosphorous adducts and <math>\text{P}(\text{NMe}_2)_3</math> (<math>^1\text{H}</math> and <math>^{13}\text{C}</math> NMR, TG, LIFDI MS)</b>                                                              | <b>2</b> |
| <b>PEALD process development for <math>\text{AlP}_x\text{O}_y</math> thin films using TMAPIP and <math>\text{O}_2</math> plasma at 120 °C</b>                                                                                                      | <b>5</b> |
| Compositional analysis of $\text{AlP}_x\text{O}_y$ thin films using RBS/NRA                                                                                                                                                                        | 5        |
| <b>PEALD process development for <math>\text{AlP}_x\text{O}_y</math> thin films using supercycles of TMA and <math>\text{P}(\text{NMe}_2)_3</math> with <math>\text{O}_2</math> plasma</b>                                                         | <b>6</b> |
| Compositional analysis of $\text{AlP}_x\text{O}_y$ thin films deposited at 150 °C using a supercycle with varying numbers of $\text{P}(\text{NMe}_2)_3$ (A) cycles and a single TMA (B) cycle with $\text{O}_2$ plasma performed by RBS/NRA        | 7        |
| Compositional analysis of $\text{AlP}_x\text{O}_y$ thin films deposited at different temperatures using a supercycle that alternates between one $\text{P}(\text{NMe}_2)_3$ (A) cycle and one TMA (B) cycle with $\text{O}_2$ plasma by RBS/NRA    | 7        |
| Compositional analysis of $\text{AlP}_x\text{O}_y$ thin films deposited at different temperatures using a supercycle that alternates between two $\text{P}(\text{NMe}_2)_3$ (A) cycles and one TMA (B) cycle with $\text{O}_2$ plasma by RBS/NRA   | 8        |
| Compositional analysis of $\text{AlP}_x\text{O}_y$ thin films deposited at different temperatures using a supercycle that alternates between three $\text{P}(\text{NMe}_2)_3$ (A) cycles and one TMA (B) cycle with $\text{O}_2$ plasma by RBS/NRA | 9        |
| Characterization of $\text{AlP}_x\text{O}_y$ thin films deposited on Si using PEALD supercycles (XRD, XPS, AFM, TEM)                                                                                                                               | 11       |

**Synthesis and characterization of TMA phosphorous adducts and  $P(NMe_2)_3$  ( $^1H$  and  $^{13}C$  NMR, TG, LIFDI MS)**

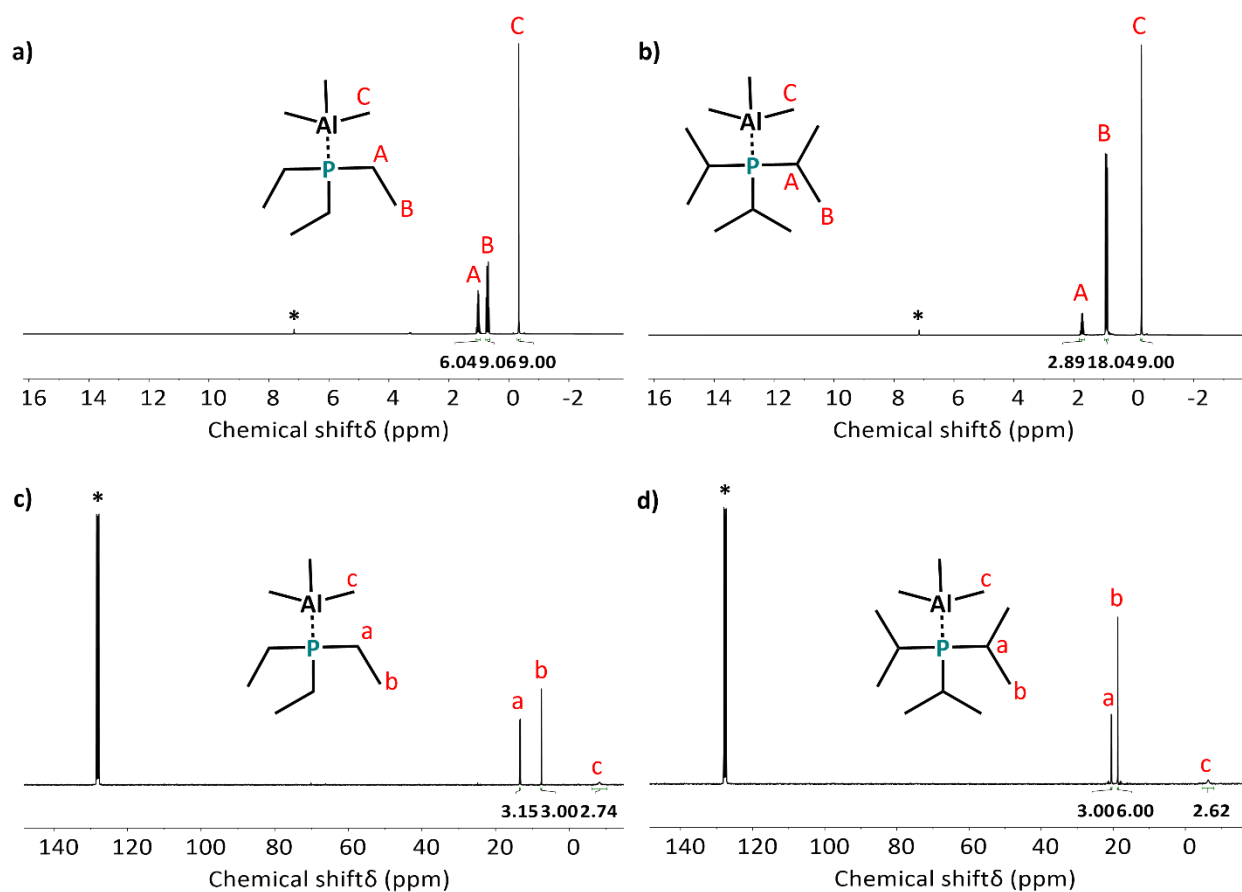

**Figure S1.** Full  $^1H$  (top) and  $^{13}C$  NMR (bottom) spectra of TMAPET (a, c) and TMAPIP (b, d) with assigned peaks. All spectra are recorded in benzene- $d_6$  (marked with an asterisk).

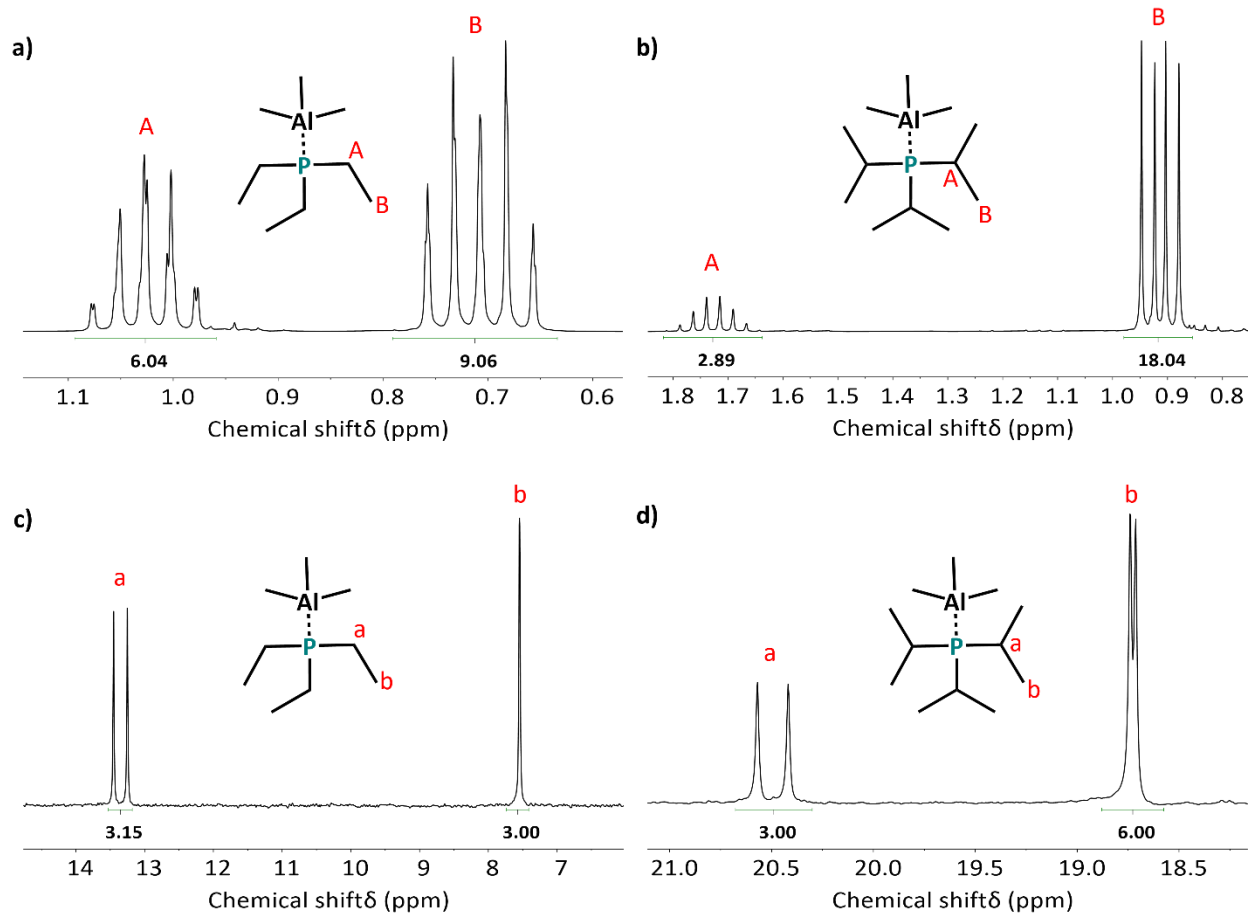

**Figure S2.**  $^1\text{H}$  (top) and  $^{13}\text{C}$  NMR (bottom) spectra of TMAPET (a, c) and TMAPIP (b, d) with a zoom into the region of signals originating from the P-adducts. All spectra are recorded in benzene- $d_6$ .

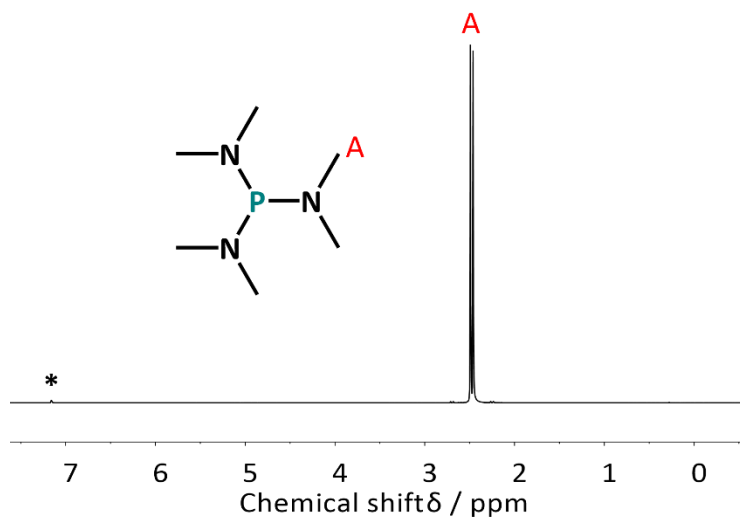

**Figure S3.**  $^1\text{H}$  NMR of  $\text{P}(\text{NMe}_2)_3$ , recorded in benzene- $d_6$  (marked with an asterisk).

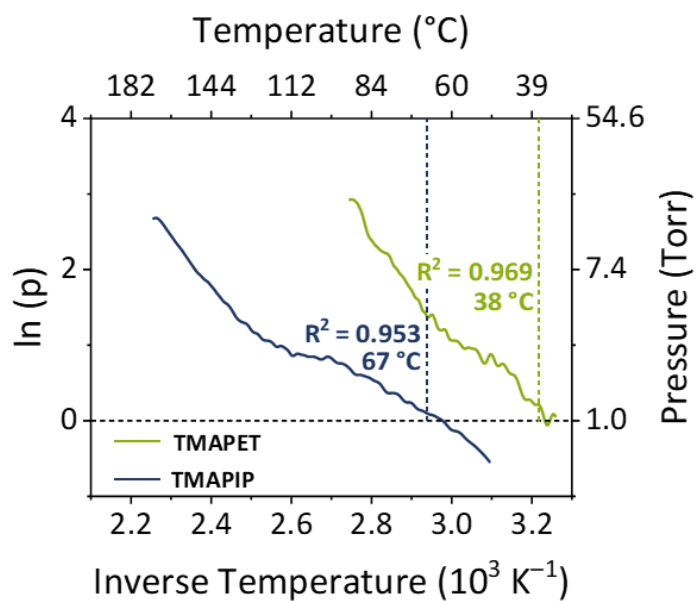

**Figure S4.** Clausius-Clapeyron plots of TMAPET (green) and TMAPIP (blue), derived from DTG data.

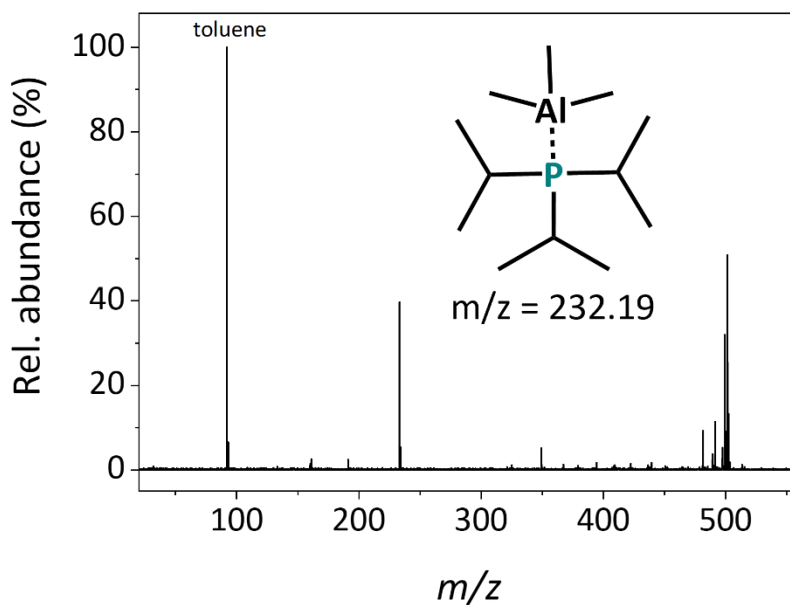

**Figure S5.** LIFDI-MS spectrum of TMAPIP recorded in toluene.

## PEALD process development for $\text{AlP}_x\text{O}_y$ thin films using TMAPIP and $\text{O}_2$ plasma at 120 °C

### Compositional analysis of $\text{AlP}_x\text{O}_y$ thin films using RBS/NRA

For all samples on Si, the Al concentration must be considered a qualitative approximation, as the Al peak overlaps with the broad Si signal from the substrate in RBS and cannot be determined by NRA.

For better comparability, the stoichiometry from RBS/NRA results on GC has been calculated by normalizing the P and O concentrations relative to Al, yielding the composition as  $\text{Al}_1\text{P}_x\text{O}_y$ .

**Table S1.** Composition of  $\text{AlP}_x\text{O}_y$  thin films deposited on Si using TMAPIP.

| TMAPIP pulse (ms) | C (at.%) | N (at.%) | O (at.%) | Al (at.%) | P (at.%) |
|-------------------|----------|----------|----------|-----------|----------|
| 150               | 1.6      | 1.4      | 67.8     | 25.7      | 3.6      |
| 300               | 0.7      | 0.1      | 59.5     | 36.5      | 3.2      |
| 500               | 1.2      | 0.0      | 67.0     | 28.8      | 3.0      |

**Table S2.** Composition of  $\text{AlP}_x\text{O}_y$  thin films deposited on GC using TMAPIP and the derived stoichiometry.

| TMAPIP pulse (ms) | N (at.%) | O (at.%) | Al (at.%) | P (at.%) | $\text{AlP}_x\text{O}_y$ |      |
|-------------------|----------|----------|-----------|----------|--------------------------|------|
|                   |          |          |           |          | x                        | y    |
| 150               | 0.0      | 64.9     | 31.6      | 3.5      | 0.11                     | 2.05 |
| 300               | 0.0      | 64.8     | 32.1      | 3.1      | 0.10                     | 2.01 |
| 500               | 0.0      | 65.6     | 30.6      | 3.8      | 0.12                     | 2.14 |

## PEALD process development for $\text{AlP}_x\text{O}_y$ thin films using supercycles of TMA and $\text{P}(\text{NMe}_2)_3$ with $\text{O}_2$ plasma

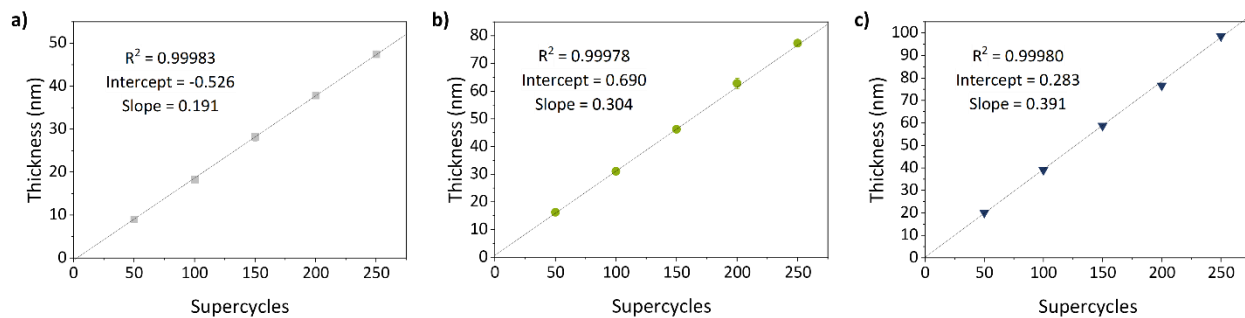

**Figure S6.** Linearity of thickness versus the number of PEALD supercycles, consisting of **a)** A+B, **b)** 2A+B, and **c)** 3A+B, with a linear fit for each dataset.

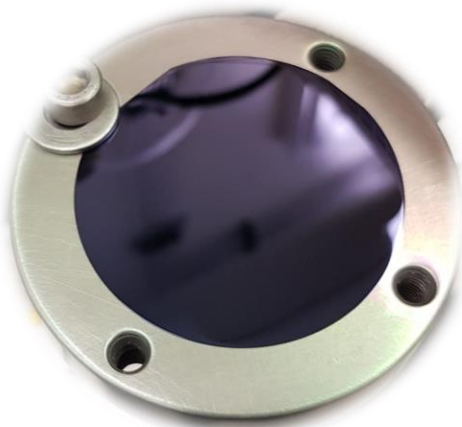

**Figure S7.** An image of a 2-inch Si wafer uniformly coated with 98.6 nm of  $\text{AlP}_x\text{O}_y$  using 250 SCs consisting of a 3A+B sequence at 150 °C.

**Compositional analysis of  $\text{AlP}_x\text{O}_y$  thin films deposited at 150 °C using a supercycle with varying numbers of  $\text{P}(\text{NMe}_2)_3$  (A) cycles and a single TMA (B) cycle with  $\text{O}_2$  plasma performed by RBS/NRA**

**Table S3.** Composition of  $\text{AlP}_x\text{O}_y$  thin films deposited on Si using supercycles of varying A cycles and one B cycle.

| SC   | C (at.%) | N (at.%) | O (at.%) | Al (at.%) | P (at.%) |
|------|----------|----------|----------|-----------|----------|
| A+B  | 0.9      | 0.0      | 66.1     | 19.2      | 13.8     |
| 2A+B | 0.6      | 0.8      | 61.6     | 20.7      | 16.3     |
| 3A+B | 0.3      | 1.0      | 63.9     | 16.5      | 18.3     |
| 4A+B | 0.2      | 0.5      | 69.3     | 9.9       | 20.0     |

**Table S4.** Composition of  $\text{AlP}_x\text{O}_y$  thin films deposited on GC using supercycles of varying A cycles and one B cycle, and the derived stoichiometry.

| SC   | N (at.%) | O (at.%) | Al (at.%) | P (at.%) | $\text{AlP}_x\text{O}_y$ |      |
|------|----------|----------|-----------|----------|--------------------------|------|
|      |          |          |           |          | x                        | y    |
| A+B  | 0.3      | 66.8     | 20.5      | 12.4     | 0.60                     | 3.25 |
| 2A+B | 1.5      | 65.9     | 15.2      | 17.5     | 1.15                     | 4.34 |
| 3A+B | 0.6      | 67.5     | 12.8      | 19.1     | 1.49                     | 5.26 |
| 4A+B | 0.8      | 68.9     | 10.6      | 19.7     | 1.86                     | 6.50 |

**Compositional analysis of  $\text{AlP}_x\text{O}_y$  thin films deposited at different temperatures using a supercycle that alternates between one  $\text{P}(\text{NMe}_2)_3$  (A) cycle and one TMA (B) cycle with  $\text{O}_2$  plasma by RBS/NRA**

**Table S5.** Composition of  $\text{AlP}_x\text{O}_y$  thin films deposited on Si using a supercycle of one A cycle and one B cycle.

| $T_{\text{dep}}$ (°C) | C (at.%) | N (at.%) | O (at.%) | Al (at.%) | P (at.%) |
|-----------------------|----------|----------|----------|-----------|----------|
| 60                    | 0.7      | 0.2      | 53.4     | 39.1      | 6.6      |
| 80                    | 0.6      | 0.0      | 57.9     | 32.4      | 9.1      |
| 100                   | 0.5      | 0.0      | 57.8     | 31.9      | 9.8      |
| 125                   | 0.6      | 0.0      | 55.6     | 33.1      | 10.7     |
| 150                   | 0.9      | 0.0      | 66.1     | 19.2      | 13.8     |
| 175                   | 0.5      | 1.0      | 52.5     | 34.8      | 11.2     |
| 200                   | 0.5      | 0.3      | 60.9     | 24.4      | 13.9     |
| 220                   | 0.7      | 0.2      | 60.5     | 24.8      | 13.8     |
| 240                   | 0.3      | 0.0      | 60.0     | 26.9      | 12.8     |

**Table S6.** Composition of  $\text{AlP}_x\text{O}_y$  thin films deposited on GC using a supercycle with one A cycle and one B cycle, along with the derived stoichiometry.

| $T_{\text{dep}}$ (°C) | N (at.%) | O (at.%) | Al (at.%) | P (at.%) | $\text{AlP}_x\text{O}_y$ |      |
|-----------------------|----------|----------|-----------|----------|--------------------------|------|
|                       |          |          |           |          | x                        | y    |
| 60                    | 0.7      | 67.0     | 24.7      | 7.6      | 0.31                     | 2.72 |
| 80                    | 0.8      | 67.1     | 22.8      | 9.3      | 0.41                     | 2.94 |
| 100                   | 0.5      | 66.8     | 22.2      | 10.6     | 0.48                     | 3.01 |
| 125                   | 0.7      | 67.2     | 20.6      | 11.6     | 0.56                     | 3.27 |
| 150                   | 0.3      | 66.8     | 20.5      | 12.4     | 0.60                     | 3.25 |
| 175                   | 0.6      | 67.2     | 19.5      | 12.7     | 0.65                     | 3.44 |
| 200                   | 0.7      | 66.7     | 19.5      | 13.2     | 0.68                     | 3.43 |
| 220                   | 0.7      | 67.3     | 18.1      | 13.9     | 0.77                     | 3.72 |
| 240                   | 0.7      | 67.9     | 18.5      | 12.9     | 0.70                     | 3.67 |

**Compositional analysis of  $\text{AlP}_x\text{O}_y$  thin films deposited at different temperatures using a supercycle that alternates between two  $\text{P}(\text{NMe}_2)_3$  (A) cycles and one TMA (B) cycle with  $\text{O}_2$  plasma by RBS/NRA**

**Table S7.** Composition of  $\text{AlP}_x\text{O}_y$  thin films deposited on Si using a supercycle of two A cycles and one B cycle.

| $T_{\text{dep}}$ (°C) | C (at.%) | N (at.%) | O (at.%) | Al (at.%) | P (at.%) |
|-----------------------|----------|----------|----------|-----------|----------|
| 60                    | 0.5      | 0.3      | 63.0     | 21.6      | 14.6     |
| 80                    | 0.5      | 0.0      | 58.5     | 26.8      | 14.2     |
| 100                   | 0.4      | 0.8      | 58.7     | 25.5      | 14.7     |
| 125                   | 0.3      | 0.0      | 61.1     | 23.4      | 15.1     |
| 150                   | 0.3      | 0.0      | 59.1     | 25.4      | 15.1     |
| 175                   | 0.5      | 0.0      | 64.3     | 17.4      | 17.8     |
| 200                   | 0.3      | 0.0      | 56.5     | 28.6      | 14.6     |
| 220                   | 0.3      | 0.6      | 62.9     | 20.8      | 15.4     |
| 240                   | 0.4      | 0.9      | 60.9     | 22.4      | 15.4     |



**Table S8.** Composition of  $\text{AlP}_x\text{O}_y$  thin films deposited on GC using a supercycle with two A cycles and one B cycle, along with the derived stoichiometry.

| $T_{\text{dep}}$ (°C) | N (at.%) | O (at.%) | Al (at.%) | P (at.%) | $\text{AlP}_x\text{O}_y$ |      |
|-----------------------|----------|----------|-----------|----------|--------------------------|------|
|                       |          |          |           |          | x                        | y    |
| 60                    | 0.8      | 67.7     | 16.7      | 14.8     | 0.88                     | 4.05 |
| 80                    | 1.2      | 67.4     | 15.4      | 16.0     | 1.04                     | 4.37 |
| 100                   | 0.6      | 69.0     | 15.1      | 15.3     | 1.01                     | 4.56 |
| 125                   | 0.8      | 69.8     | 14.4      | 15.0     | 1.04                     | 4.84 |
| 150                   | 0.5      | 69.2     | 14.7      | 15.5     | 1.05                     | 4.70 |
| 175                   | 1.1      | 67.0     | 16.1      | 15.7     | 0.98                     | 4.16 |
| 200                   | 0.8      | 68.0     | 15.3      | 15.9     | 1.04                     | 4.44 |
| 220                   | 0.7      | 67.5     | 16.2      | 15.6     | 0.96                     | 4.16 |
| 240                   | 1.3      | 70.7     | 11.6      | 16.5     | 1.42                     | 6.11 |

**Compositional analysis of  $\text{AlP}_x\text{O}_y$  thin films deposited at different temperatures using a supercycle that alternates between three  $\text{P}(\text{NMe}_2)_3$  (A) cycles and one TMA (B) cycle with  $\text{O}_2$  plasma by RBS/NRA**

**Table S9.** Composition of  $\text{AlP}_x\text{O}_y$  thin films deposited on Si using a supercycle of three A cycles and one B cycle.

| $T_{\text{dep}}$ (°C) | C (at.%) | N (at.%) | O (at.%) | Al (at.%) | P (at.%) |
|-----------------------|----------|----------|----------|-----------|----------|
| 60                    | 0.4      | 0.4      | 65.4     | 16.2      | 17.6     |
| 80                    | 0.4      | 0.3      | 65.7     | 15.9      | 17.7     |
| 100                   | 0.4      | 0.0      | 65.5     | 15.7      | 18.4     |
| 125                   | 0.2      | 1.1      | 64.7     | 15.6      | 18.5     |
| 150                   | 0.2      | 0.7      | 66.3     | 14.0      | 18.8     |
| 175                   | 0.3      | 0.0      | 65.9     | 15.0      | 18.7     |
| 200                   | 0.2      | 0.6      | 72.1     | 5.8       | 21.2     |
| 220                   | 0.4      | 0.2      | 65.0     | 14.5      | 19.9     |
| 240                   | 0.4      | 0.9      | 67.7     | 10.9      | 20.1     |

**Table S10.** Composition of  $\text{AlP}_x\text{O}_y$  thin films deposited on GC using a supercycle with three A cycles and one B cycle, along with the derived stoichiometry.

| $T_{\text{dep}}$ (°C) | N (at.%) | O (at.%) | Al (at.%) | P (at.%) | $\text{AlP}_x\text{O}_y$ |      |
|-----------------------|----------|----------|-----------|----------|--------------------------|------|
|                       |          |          |           |          | x                        | y    |
| 60                    | 0.5      | 68.2     | 14.9      | 16.4     | 1.10                     | 4.57 |
| 80                    | 0.7      | 66.8     | 15.2      | 17.3     | 1.14                     | 4.41 |
| 100                   | 0.8      | 67.1     | 14.4      | 17.7     | 1.23                     | 4.66 |
| 125                   | 0.8      | 67.6     | 13.5      | 18.1     | 1.34                     | 5.00 |
| 150                   | 0.6      | 67.5     | 12.8      | 19.1     | 1.49                     | 5.26 |
| 175                   | 0.4      | 67.7     | 12.5      | 19.4     | 1.55                     | 5.41 |
| 200                   | 0.2      | 68.4     | 11.0      | 20.3     | 1.84                     | 6.20 |
| 220                   | 0.5      | 67.9     | 11.1      | 20.5     | 1.85                     | 6.13 |
| 240                   | 0.2      | 69.8     | 10.1      | 20.0     | 1.98                     | 6.93 |

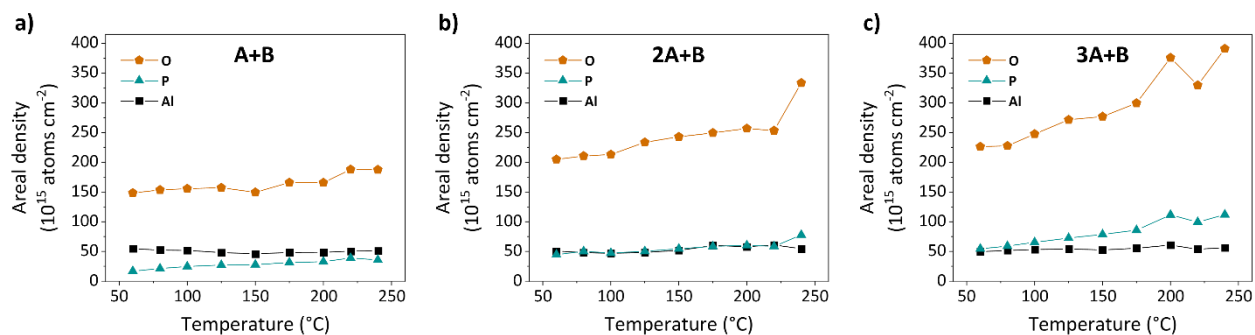

**Figure S8.** Absolute areal densities of O, P, and Al atoms in  $\text{AlP}_x\text{O}_y$  thin films deposited on GC using a supercycle of **a)** one, **b)** two, and **c)** three A cycles alternating with one B cycle, as determined by RBS.

**Table S11.** Stoichiometry of as-deposited  $\text{AlP}_x\text{O}_y$  thin films on GC using a supercycle with varying A cycles and one B cycle at different temperatures compared to the respective annealed layer. For better comparability, the stoichiometry has been normalized to an Al ratio of 1.

| $T_{\text{dep}}$ (°C) | SC       | $\text{AlP}_x\text{O}_y$ |      |
|-----------------------|----------|--------------------------|------|
|                       |          | x                        | y    |
| 150                   | 2A+B     | 1.15                     | 4.34 |
|                       | annealed | 0.57                     | 3.40 |
| 60                    | 3A+B     | 1.10                     | 4.57 |
|                       | annealed | 1.12                     | 4.85 |
| 100                   | 3A+B     | 1.23                     | 4.66 |
|                       | annealed | 1.27                     | 4.92 |
| 200                   | 3A+B     | 1.84                     | 6.20 |
|                       | annealed | 1.78                     | 5.98 |

**Characterization of  $\text{AlP}_x\text{O}_y$  thin films deposited on Si using PEALD supercycles (XRD, XPS, AFM, TEM)**

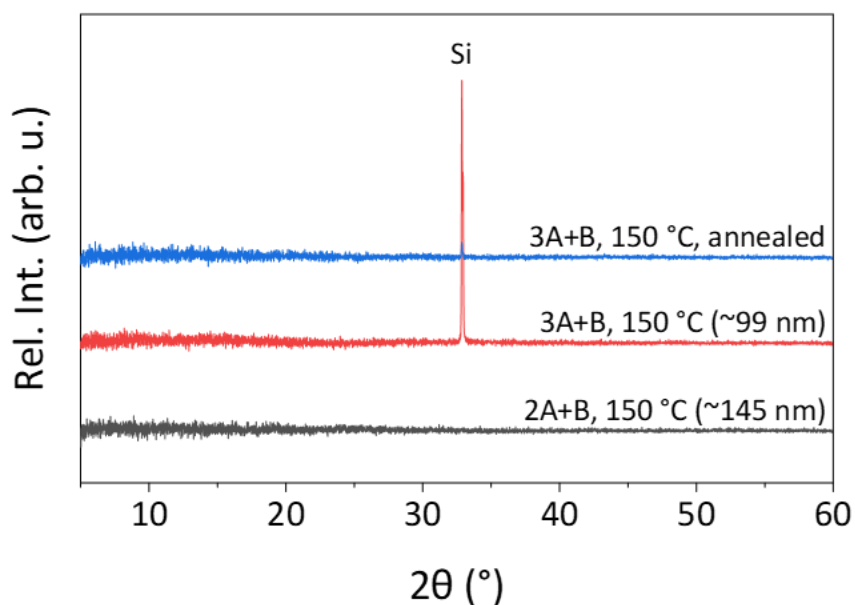

**Figure S9.** XRD of  $\text{AlP}_x\text{O}_y$  layers as deposited on Si at 150 °C using 500 2A+B SCs and 150 3A+B SCs, and after annealing at 600 °C.

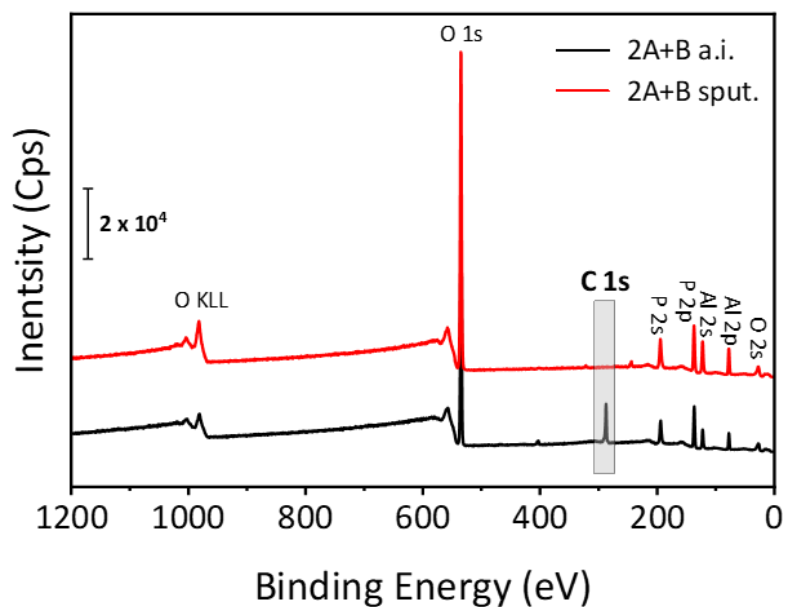

**Figure S10.** XPS survey spectra of as-introduced and sputtered surfaces of  $\text{AlPO}_4$  deposited on Si with 150 SCs using a 2A+B sequence at 150 °C. The C1s core-level region is highlighted, showing the disappearance of the carbon peak after sputtering.

**Table 12.** Al 2p, P 2p, and O 1s binding energies and their respective component shares obtained from XPS measurements of as-introduced  $\text{AlPO}_4$  thin films deposited on Si with 150 SCs using varying SC sequences at 150 °C.

| SC          | Binding energy (eV) |        |        | Component share (%) |      |      |
|-------------|---------------------|--------|--------|---------------------|------|------|
|             | Al 2p               | P 2p   | O 1s   | Al 2p               | P 2p | O 1s |
| <b>A+B</b>  | 74.86               | 134.28 | 532.12 | 29.8                | 18.5 | 51.7 |
| <b>2A+B</b> | 75.55               | 134.86 | 532.72 | 20.8                | 26.2 | 53.1 |
| <b>3A+B</b> | 76.08               | 135.42 | 533.23 | 16.8                | 28.2 | 55.1 |
| <b>4A+B</b> | 76.34               | 135.71 | 533.51 | 15.8                | 29.4 | 54.8 |

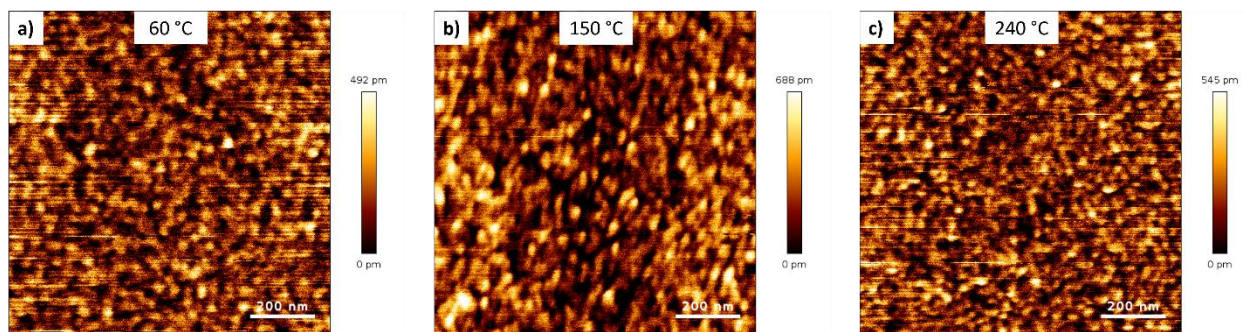

**Figure S11.** AFM images of  $\text{AlP}_x\text{O}_y$  deposited on Si with 150 A+B supercycles at **a)** 60 °C, **b)** 150 °C, and **c)** 240 °C.

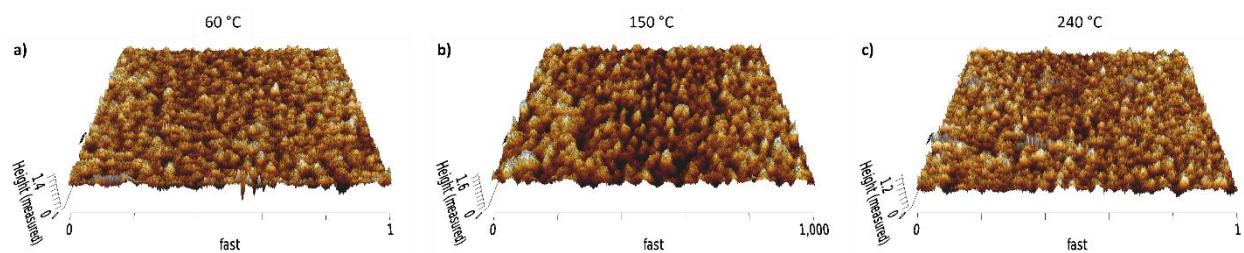

**Figure S12.** 3D view of AFM images of  $\text{AlP}_x\text{O}_y$  deposited on Si with 150 A+B supercycles at **a)** 60 °C, **b)** 150 °C, and **c)** 240 °C.

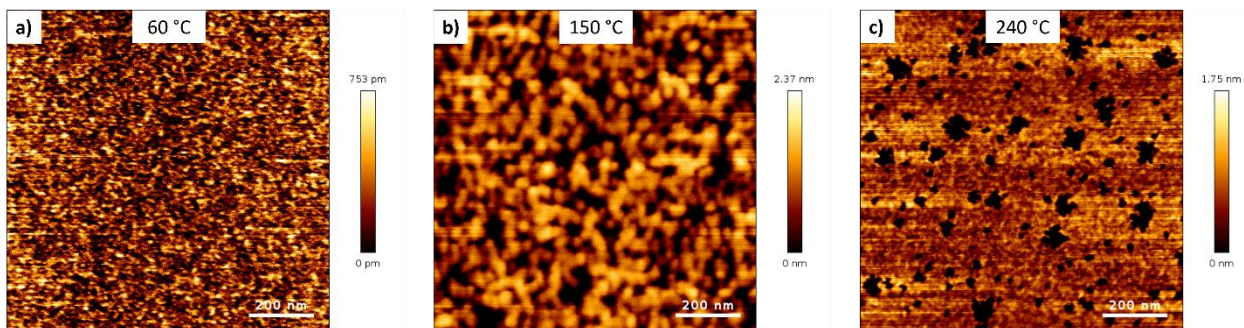

**Figure S13.** AFM images of  $\text{AlP}_x\text{O}_y$  deposited on Si with 150 2A+B supercycles at **a)** 60 °C, **b)** 150 °C, and **c)** 240 °C.

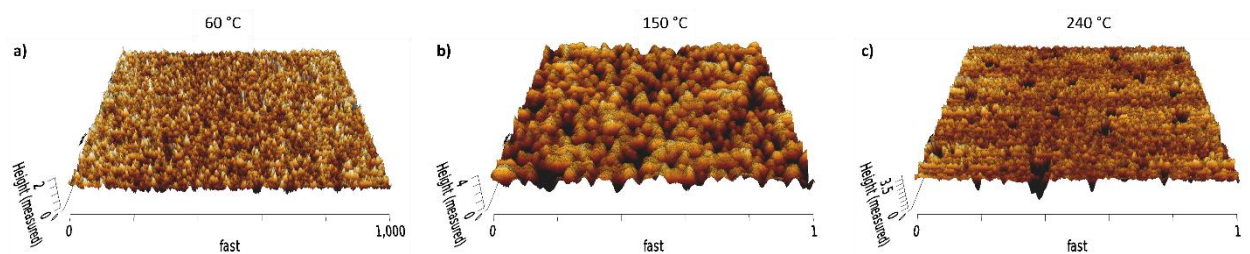

**Figure S14.** 3D view of AFM images of  $\text{AlP}_x\text{O}_y$  deposited on Si with 150 2A+B supercycles at **a)** 60 °C, **b)** 150 °C, and **c)** 240 °C.

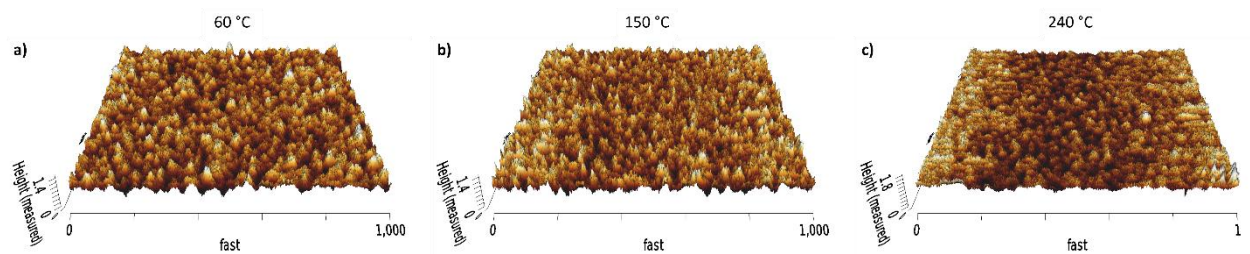

**Figure S15.** 3D view of AFM images of  $\text{AlP}_x\text{O}_y$  deposited on Si with 150 3A+B supercycles at **a)** 60 °C, **b)** 150 °C, and **c)** 240 °C.



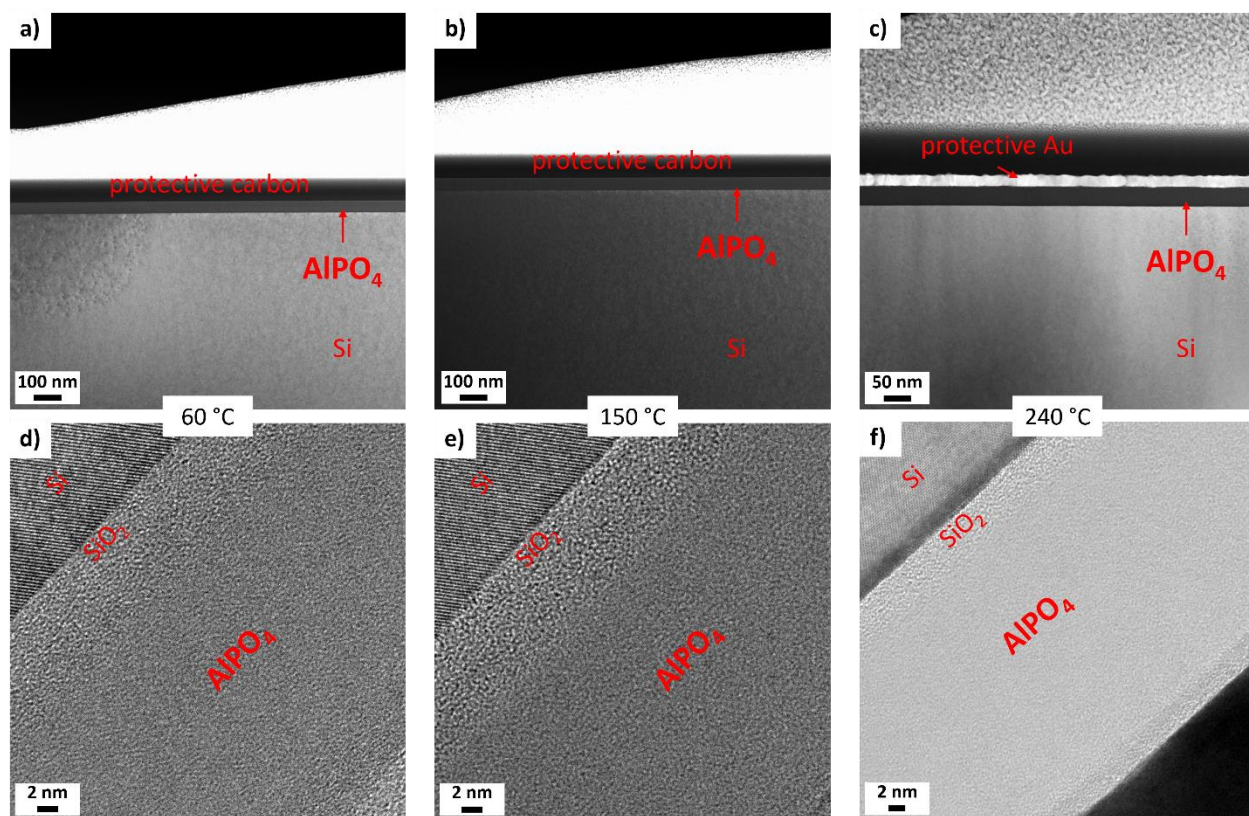

**Figure S16.** Overview of STEM images (top row) and HRTEM images (bottom row) of AlPO<sub>4</sub> deposited on Si with 150 2A+B supercycles at 60 °C (a and d), 150 °C (b and e), and 240 °C (c and f).

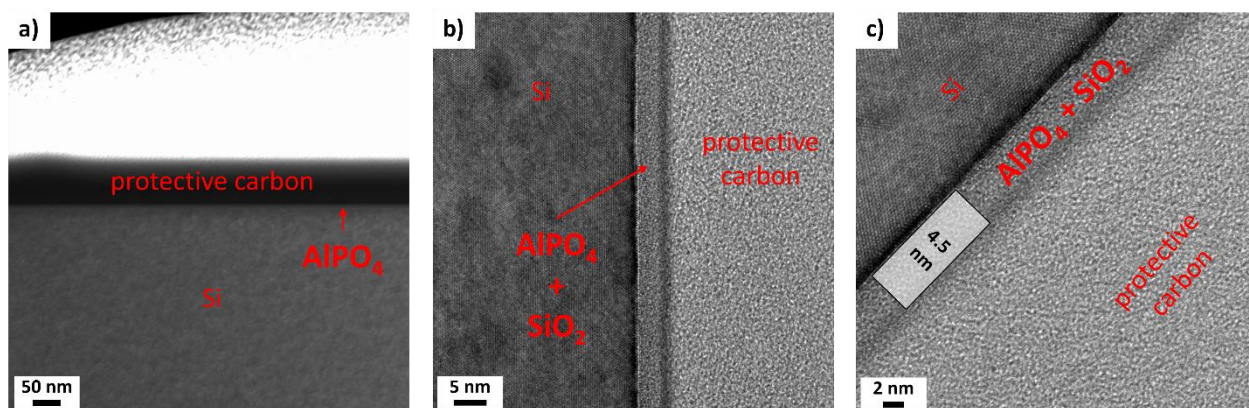

**Figure S17.** TEM images of AlPO<sub>4</sub> deposited on Si with 10 2A+B cycles at 150 °C. a) Shows an overview STEM image, while b) and c) display HRTEM images with the graphically derived thickness of the AlPO<sub>4</sub> layer.
